# 1 Genome assembly of the deep-sea coral *Lophelia pertusa*

2

3 Santiago Herrera<sup>1\*</sup>, Erik E. Cordes<sup>2</sup>

4 <sup>1</sup>Department of Biological Sciences, Lehigh University, Bethlehem, PA USA

5 <sup>2</sup>Biology Department, Temple University, Philadelphia, PA USA

6 \*[santiago.herrera@lehigh.edu](mailto:santiago.herrera@lehigh.edu)

7

## 8 Abstract

9 Like their shallow-water counterparts, cold-water corals create reefs that support highly diverse  
10 communities, and these structures are subject to numerous anthropogenic threats. Here, we present the  
11 genome assembly of *Lophelia pertusa* from the southeastern coast of the USA, the first one for a deep-sea  
12 scleractinian coral species. We generated PacBio CLR data for an initial assembly and proximity ligation  
13 data for scaffolding. The assembly was annotated using evidence from transcripts, proteins, and *ab initio*  
14 gene model predictions. This assembly is comparable to high-quality reference genomes from shallow-  
15 water scleractinian corals. The assembly comprises 2,858 scaffolds (N50 1.6 Mbp) and has a size of 556.9  
16 Mbp. Approximately 57% of the genome comprises repetitive elements and 34% of coding DNA. We  
17 predicted 41,089 genes, including 91.1% of complete metazoan orthologs. This assembly will facilitate  
18 investigations into the ecology of this species and the evolution of deep-sea corals.

19

## 20 Keywords

21 Scleractinia, cold water, azooxanthellate, stony coral, PacBio

22

## 23 Data Description

### 24 Context

25 Stony corals (Order Scleractinia) are foundational species in marine seafloor ecosystems  
26 worldwide. Due to their ecological importance, more than 40 whole genome assemblies of shallow-water  
27 scleractinian corals have been published to date [1–3]. Although most commonly associated with warm,  
28 shallow, tropical reefs, scleractinian stony corals are at least as diverse in cold water, particularly below the  
29 sunlit surface ocean (i.e., deeper than 50 meters below sea level or mbsl) [4]. However, no genome  
30 assemblies for deep-sea or cold-water scleractinian corals have been available previously.

31 Cold-water coral reefs support highly diverse communities comprising faunal biomass orders of  
32 magnitude above the surrounding seafloor [5–7]. In addition to this tightly-associated community, cold-  
33 water corals may also serve as important breeding, nursery, and feeding areas for a multitude of fishes and  
34 invertebrates [8,9]). These communities rely on the transport of surface productivity to depth because of  
35 the lack of photosynthetic symbionts in the corals. Like their shallow-water counterparts, deep-sea corals  
36 are subject to ongoing anthropogenic threats, from ocean warming and acidification [10] to oil pollution  
37 [11]. Among deep-sea corals, *Lophelia pertusa* (Linnaeus, 1758), also known as *Desmophyllum pertusum*  
38 (NCBI:txid174260) [12], is one of the most ecologically important species. *Lophelia pertusa* is a  
39 scleractinian coral that builds reef structures (Fig. 1). This coral has a nearly-cosmopolitan distribution,  
40 spanning from approximately 80 mbsl off the coast of Norway to over 1000 mbsl on the Mid-Atlantic  
41 Ridge. Although *L. pertusa* is arguably the best-studied deep-sea coral species, a high-quality reference

42 genome assembly has yet to be available. This hinders our understanding of the biology of this coral species,  
43 its ecological functions, and capacity to survive anthropogenic threats.

44 Here, we present the genome assembly of *Lophelia pertusa*, the first one for a deep-sea scleractinian  
45 coral species. Only one other published genomic-level DNA sequence dataset exists for *D. pertusum*.  
46 Emblem and collaborators [13] produced 73 million SOLiD ligation sequencing reads and 1.2 million 454  
47 pyrosequencing reads with average lengths of 46 bp and 580 bp, respectively. The Emblem dataset was  
48 useful for detecting mitochondrial single nucleotide polymorphisms but needed higher coverage and more  
49 cohesive to produce a useful genome assembly. Our study used PacBio CLR data for the initial assembly,  
50 followed by proximity ligation data for scaffolding and RNA-seq data for annotation. Our approach yielded  
51 a genome assembly of comparable quality to those obtained from shallow-water scleractinian corals [14–  
52 17].

53

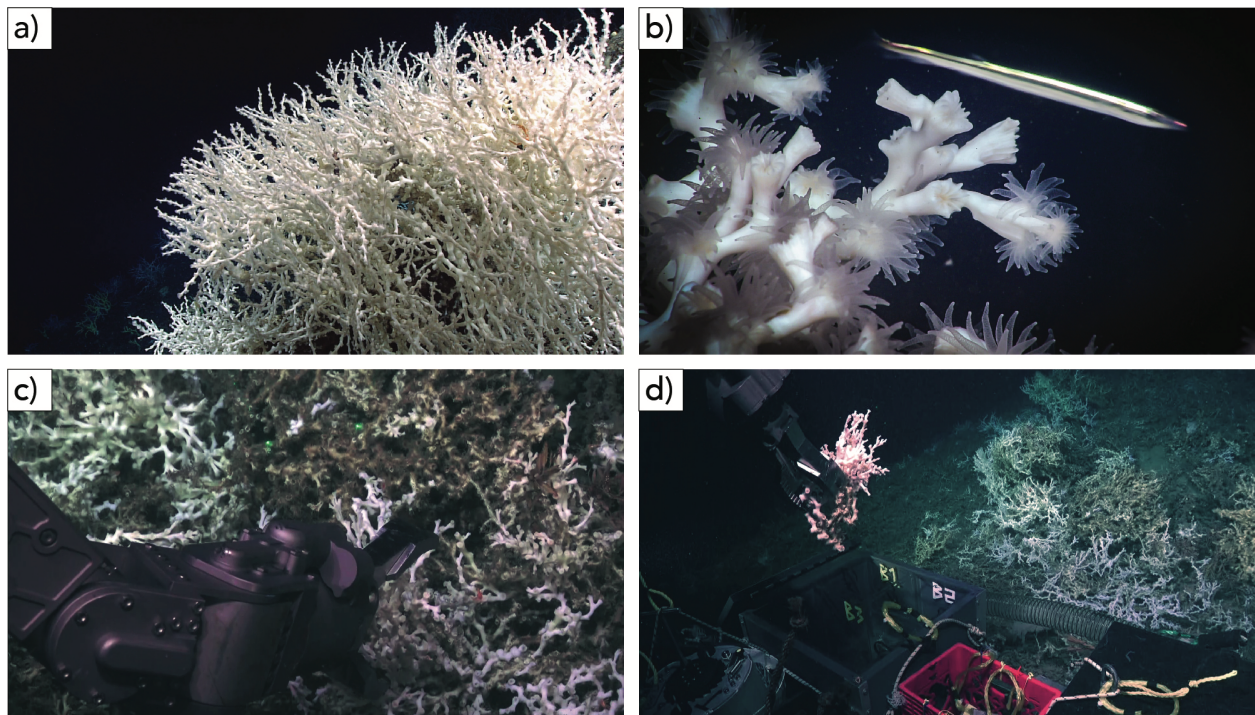

54

55 **Figure 1.** *In situ* images of the coral *Lophelia pertusa* in the Atlantic U.S. southeast shelf. (a) *Lophelia*  
56 reef. (b) Close-up of *Lophelia* polyps. (c) Collection of *Lophelia* sample sequenced in this study using the  
57 hydraulic arm of ROV Jason. (d) *Lophelia* sample being placed in ROV Jason’s biobox. Images (a) and  
58 (b) courtesy of NOAA OER, Windows to the Deep 2019. Images (c) and (d) courtesy of the Deep  
59 SEARCH program and copyright Woods Hole Oceanographic Institution (CC BY).

60

## 61 Methods

### 62 *Sample collection*

63 Branches of *Lophelia pertusa* were obtained from the Savannah Banks site, off the southeastern  
64 coast of the continental USA, Atlantic Ocean (latitude 31.75420, longitude -79.19442, depth 515 mbsl),  
65 while aboard the NOAA Ship *Ronald Brown* (expedition RB1903) using ROV *Jason* (Dive 1130) on  
66 April 17, 2019 (BioSample accession SAMN31822850). The branches were collected using a hydraulic  
67 robotic arm and stored in an insulated bio-box until they reached the surface (**Figs. 1c-d**). Once onboard  
68 the ship, they were immersed in cold RNALater (Thermo Fisher), left to soak in the refrigerator (4°C) for

69 24 hours, and then frozen at -80°C. Samples remained at that temperature until DNA was purified back in  
70 the laboratory.

71

## 72 *DNA purification*

73 Polyp tissue was scraped from the skeleton and digested in 2% Cetyltrimethyl Ammonium  
74 Bromide (CTAB) buffer with 0.5%  $\beta$ -mercaptoethanol for 15 minutes at 68°C. The DNA was purified  
75 through two rounds of phenol: chloroform: isoamyl alcohol (25:24:1) and one round of chloroform:  
76 isoamyl alcohol (24:1) mixing and partitioning through centrifugation at 10,000 rpm for 10 minutes. The  
77 DNA was precipitated out of the solution with 100% isopropanol. The resulting pellet was washed with  
78 70% ethanol, then air-dried and resuspended in Qiagen G2 buffer. DNA concentration was quantified  
79 using a Qubit fluorometer (Invitrogen). The DNA was further purified using the Blood & Cell Culture  
80 DNA Midi Kit (Qiagen kit #13343) following the manufacturer's protocol after one hour of protease  
81 digestion. The average DNA fragment size was determined using pulsed-field gel electrophoresis (PFGE).

82

## 83 *DNA sequencing*

84 A total of 19.3 Gbp contained in 2.07 million continuous long reads (CLR) were generated using  
85 a PacBio Sequel sequencer. For this, a 20 kb PacBio SMRTbell library was constructed using Blue Pippin  
86 Size selection. Long-insert chromosome conformation capture Chicago [18] and Hi-C [19] libraries (one  
87 each) were constructed and sequenced on an Illumina Hiseq X sequencer (PE 150bp), yielding 46.7 Gbp  
88 (156 million pairs) for the Chicago library and 72.6 Gbp (242 million pairs) for the Hi-C library.

89

## 90 *De novo genome assembly*

91 The analytical pipeline to generate the *de novo* assembly of *Lophelia pertusa* is depicted in [Fig. 2](#).  
92 *De novo* genome assembly of PacBio data was performed using the assemblers flye v2.9 [20], wtdbg2  
93 v2.5 [21], and FALCON [22], in combination with the polishing tools NextPolish v1.3.1 [23] and Arrow  
94 as implemented in the Pacific Biosciences GenomicConsensus package  
95 (<https://github.com/PacificBiosciences/GenomicConsensus>), and the haplotig and contig overlap removal  
96 program purge\_dups v.1.2.3 [24]. First, we generated an assembly with flye using default parameters,  
97 followed by purging with purge\_dups and polishing with NextPolish (assembly A). Using default  
98 parameters, we generated a second assembly with wtdbg2 and polished it with NextPolish (assembly B).  
99 A third assembly was generated using FALCON, followed by polishing with Arrow and purging with  
100 purge\_dups (assembly C). Assemblies A and B were combined by aligning the flye assembly against the  
101 wtdbg2 assembly using MUMmer v4.0 [25] followed by merging with Quickmerge v0.3 [26] (-hco 5.0 -c  
102 1.5 -l 248998 -ml 5000). The resulting assembly was polished with NextPolish (assembly D). Assembly  
103 D was aligned against assembly C using MUMmer and merged with Quickmerge. Finally, the resulting  
104 merged assembly between C and D was polished with NextPolish and purged with purge\_dups (assembly  
105 E). Assemblies generated with other programs were not included because they had lower assembly  
106 contiguity or completeness (see Data validation and quality control section, [Appendix 1](#)).

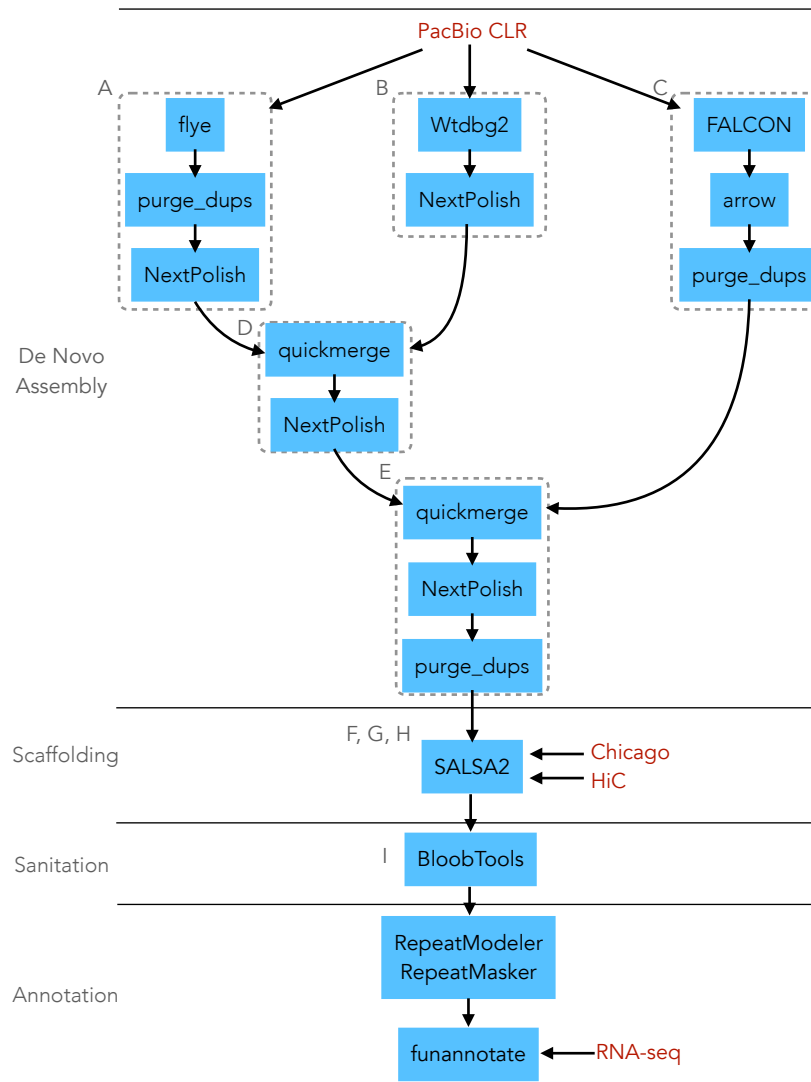

107

108 **Figure 2.** Flow chart depicting the assembly pipeline for the *Lophelia pertusa* genome. Dotted  
 109 boxes indicate the different *de novo* assemblies. Letters indicate the designed nomenclature of each  
 110 assembly as reflected in the text and **Appendix 1**. Data inputs are indicated in maroon font. Software  
 111 packages are highlighted with blue background.

112

### 113 *Scaffolding*

114 Assembly E was scaffolded with long-insert Chicago CLR, and Hi-C reads following the Arima  
 115 Genomics mapping pipeline A160156 v02 (retrieved from  
 116 [https://github.com/ArimaGenomics/mapping\\_pipeline](https://github.com/ArimaGenomics/mapping_pipeline)). First, the reads from the Chicago library were  
 117 aligned to assembly E using the MEM algorithm of the program BWA v0.7.17 [27]. Chicago and Hi-C  
 118 sequence data had mapping rates to the assembly of 96% and 98%, indicating high quality. Chimeric  
 119 reads that mapped in the 3' direction were excluded using the filter\_five\_end.pl script. Reads were  
 120 combined into pairs with the two\_read\_bam\_combiner.pl script and sorted using Samtools v.1.10 [28].  
 121 The program Picard tools v2.26.6 (<https://broadinstitute.github.io/picard/>) was used to add read groups to  
 122 the resulting bam file and remove PCR duplicates. The program SALSAA2 v2.2 [29,30] (-e GATC -m yes)



123 was used for scaffolding assembly E with the mapped Chicago reads (assembly F). The Hi-C reads they  
124 were mapped to assembly H using the same procedure described above and re-scaffolded with SALSA2  
125 (assembly H).

126

### 127 *Sanitation*

128 The program BloobToolsKit v2.2 [31] was used to identify non-target scaffolds from assembly H.  
129 First; scaffolds were queried against the nucleotide collection database (nt) from the National Center for  
130 Biotechnology Information (NCBI), retrieved on May 5, 2020, using NCBI BLAST+ blastn v2.10 [32].  
131 Scaffolds were then queried against the UniProt protein sequence database [33], retrieved on May 5,  
132 2020, using DIAMOND blastx vv0.9.14.115 [34]. Assembly coverage evenness was assessed by mapping  
133 the raw PacBio reads against assembly H using minimap2 v2.24-r1122 [35]. We excluded 6 scaffolds  
134 with significant matches to non-eukaryotic sequences (i.e., bacteria and viruses). We also excluded 4,531  
135 scaffolds with significant deviations in coverage ( $<x0.01$ ,  $>x65$ ) or GC content ( $<26\%$ ,  $>52.5\%$ ) relative  
136 to the assembly-wide means (coverage = 3.27x, GC content = 39.81%) (assembly I). This Whole Genome  
137 Shotgun (WGS) project was deposited at DDBJ/ENA/GenBank under the accession JAPMOT000000000.

138

### 139 *Annotation*

140 Repetitive elements in the genome assembly I were identified *de novo* with the RepeatModeler  
141 v2.0.2 package, including the programs RECON v1.05 [36] and RepeatScout v1.06 [37]. Repetitive  
142 elements were classified using RepeatClassifier v 2.0.2 and soft-masked using RepeatMasker v4.1.2 [38].  
143 This procedure resulted in 57.37% of the genome assembly being masked.

144 The masked genome assembly was used for functional annotation using the Funannotate v1.8.9  
145 pipeline [39]. First, we performed a *de novo* genome-guided transcriptome assembly using the  
146 Funannotate *train* script with the *Lophelia pertusa* RNA-seq data published by Glazier and colleagues  
147 [40]. In short, (1) The RNA-seq data reads were normalized with Trinity v2.8.5 [41] and mapped to the  
148 masked genome assembly using HISAT2 v2.2.1 [42]; (2) A transcriptome assembly was generated with  
149 these mapped reads using Trinity; (3) the PASA v2.4.1 [43] program was used to produce a likely set of  
150 protein-coding genes based on transcript alignments.

151 Second, we performed gene prediction using the Funannotate *predict* script (`--repeats2evm --`  
152 `max_intronlen 30000 --busco_db metazoa`). With this script, we (1) Parsed transcripts alignments to the  
153 genome to use as transcript evidence; (2) Aligned the UniProtKB/SwissProt v2021\_04 curated protein  
154 database [44] to the genomes and parsed alignments to use as protein evidence; (3) Generated *ab initio*  
155 gene model predictions from the masked assembly with GeneMark-ES/ET v4.68 [45,46], Augustus v3.3.3  
156 [47], SNAP v2013\_11\_29 [48], and GlimmerHMM v3.0.4 [49], using PASA gene modes for training; (4)  
157 Computed a weighted consensus of gene models from transcript, protein, and *ab initio* evidence using  
158 EVidenceModeler v.1.1.1 [50] (evidence source/weight: transcript/1, protein/1, Augustus/1, Augustus  
159 HiQ/2, GeneMark/1, GlimmerHMM/1, PASA/6, Snap/1); (5) Filtered gene models to exclude  
160 transposable elements and lengths  $<50$  aa; (6) Predicted tRNAs using tRNAscan-SE v2.0.9 [51]. In total,  
161 37,945 coding genes and 3,144 tRNA genes were predicted in the genome assembly. The average gene  
162 length was 4,972 bp. This analysis indicates that approximately 34% of the *Lophelia pertusa* genome is  
163 coding DNA.

164 The protein products of the predicted coding gene models were functionally annotated using the  
165 Funannotate *annotate* script. The following annotations were added: (1) Protein family domains from  
166 PFAM v35.0 using HMMer v3.3.2 to find sequence homologs [52]; (2) Gene and product names from  
167 UniProt DB v2021\_04 using DIAMOND blastp v2.0.13 [53] alignments; (3) Orthologous groups, gene,  
168 and product names from EggNog v5.0 [54] using EggNOG-mapper v2.1.6 [55]; (4) Protease annotation

169 from MEROPS v12.0 [56] using Diamond blastp; (5) Metazoan single-copy orthologs from the  
 170 OrthoDB v10 [57] using BUSCO v5 [58]; and (6) protein families and gene ontology(GO) terms from  
 171 InterPro v87 using InterProScan v5.53 [59]. This procedure yielded 24,665 EggNog annotations, 24,471  
 172 InterPro annotations, 16,020 PFAM annotations, 16,646 GO terms, and 1,086 MEROPS annotations.

173

#### 174 Quality control

175 The quality of each assembly was assessed using Quast v5.0.2 [60] and BUSCO v5 [58] (genome  
 176 analysis with the metazoan lineage orthologs dataset OrthoDB v10 [57]). The steps described in the *de*  
 177 *novo* assembly and scaffolding pipelines were implemented to maximize the contiguity, measured by the  
 178 N50 statistic, and completeness, measured by the percentage of single-copy metazoan orthologs present,  
 179 in the assembly. The final assembly, I, had an N50 of 1.61 Mbp, 5 to 10 times greater than the N50 of  
 180 initial *de novo* assemblies without merging or scaffolding (assemblies A, B, and C). Similarly, assembly I  
 181 had 89% complete single-copy metazoan orthologs of the 954 surveyed, which was between 7% and 18%  
 182 more than initial *de novo* assemblies. Quality metrics for the final assembly (I) are shown in [Fig. 3](#).  
 183 Quality metrics for all intermediate assemblies (A-H) are shown in [Appendix 1](#).

184

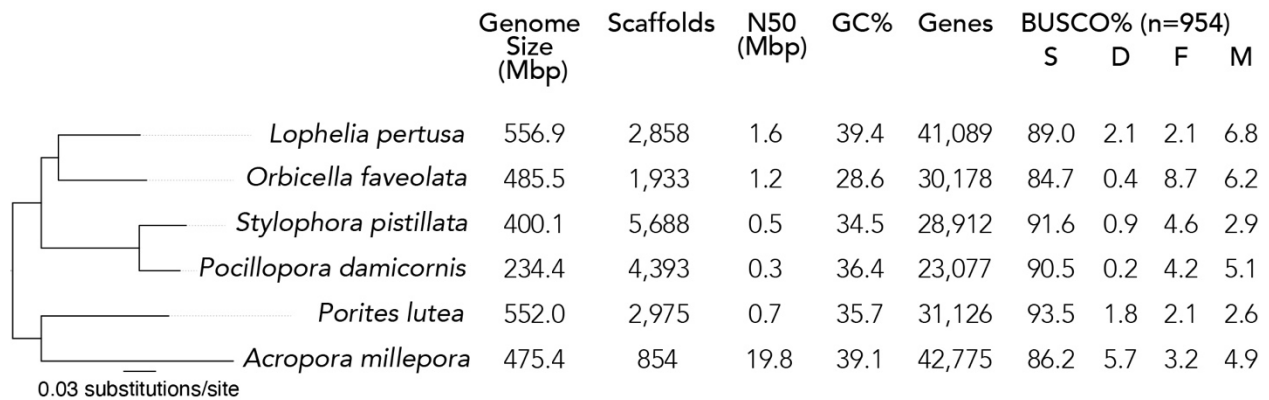

185

186 **Figure 3.** Quality metrics for the final *Lophelia pertusa* genome assembly (I), compared to other reference  
 187 genome assemblies of scleractinian corals. BUSCO percentages indicate the proportion of the 954  
 188 metazoan orthologs that are complete and single-copy (S), complete and duplicated (D), fragmented (F),  
 189 and missing (M). The phylogeny shown on the left is the best-scoring maximum likelihood tree inferred  
 190 from single-copy orthologs. All branches had 100% bootstrap confidence.

191

192 The quality of genome assembly I is comparable to those obtained from shallow-water scleractinian  
 193 corals. For comparison, we retrieved available genome assemblies of scleractinian corals with RefSeq  
 194 annotations from NCBI's Genome database. This genome set comprised assemblies for the species  
 195 *Orbicella faveolata* [14], *Stylophora pistillata* [17], *Pocillopora damicornis* [15], and *Acropora millepora*  
 196 [16]. We also retrieved the genome assembly of *Porites lutea* from reefgenomics.org. The quality of each  
 197 of these assemblies was assessed using Quast and BUSCO as described above. The *Lophelia pertusa*  
 198 assembly I has greater contiguity (N50) than most of the other scleractinian genomes in our comparison  
 199 (0.3-1.2 Mbp), except for *A. millepora* (19.8 Mbp). The completeness of the *Lophelia pertusa* assembly I  
 200 (91.1% complete metazoan orthologs, including single-copy and duplicated) is similar to the other  
 201 scleractinian genomes (85.1-95.3%). The assembly size and the number of predicted genes of *Lophelia*  
 202 *pertusa* (556.9 Mbp and 41,089 genes) are also similar, although larger than the other scleractinian genomes  
 203 (234.4-552.0 Mbp and 20,267-31,834 genes). In our comparison, we used 242 single-copy orthologs present  
 204 in all species to infer phylogenetic relationships among them. The amino-acid sequences of these orthologs

205 were aligned using MAFFT v7.453 [61] and concatenated for each species (the final concatenated  
206 alignment contained 16,619 amino-acid sites). A species phylogeny was inferred in RAxML v8.2.12 [62]  
207 using the GAMMA model of rate heterogeneity. Branch support values were estimated through 500 rapid  
208 bootstrap replicates. The resulting tree topology is congruent with the most recent phylogeny for the group  
209 [63].

210

#### 211 Re-use potential

212 The assembly of the *Lophelia pertusa* genome will facilitate numerous investigations into the ecology and  
213 evolution of this important species. This reference resource will enable population-genomic studies of this  
214 species within the U.S. exclusive economic zone and comparative studies with populations throughout the  
215 Atlantic Ocean, Gulf of Mexico, Caribbean Sea, and Mediterranean Sea. This genome assembly will also  
216 be instrumental in resolving the taxonomic position of *Lophelia pertusa* as a monotypic genus instead of  
217 its proposed placement as a species, or set of species, within the genus *Desmophyllum*. This annotated  
218 genome assembly is the first one for a deep-sea scleractinian coral and thus will provide insights into the  
219 evolutionary history of deep-sea corals and the genomic adaptations to the deep-sea environment.

220

#### 221 **Data Availability**

222 The sequence data and metadata supporting the results of this article are available at the U.S. National  
223 Library of Medicine, National Center for Biotechnology Information (NCBI) under BioProject accession  
224 PRJNA903949, BioSample accession SAMN31822850, WGS accession JAPMOT000000000, and SRA  
225 accessions SRR22387542 (Hi-C reads), SRR22387543 (Chicago reads), and SRR22387544 (PacBio  
226 reads). The RNA-seq data is available under BioProject accession PRJNA922177. A voucher of the  
227 *Lophelia pertusa* specimen sequenced in this study is available at the Smithsonian Institution National  
228 Museum of Natural History under accession number USNM 1676648.

229

#### 230 **List of abbreviations**

231

#### 232 **Ethics approval and consent to participate**

233 Not applicable

234

#### 235 **Consent for publication**

236 Approved for publication by the Bureau of Ocean Energy Management.

237

#### 238 **Competing interests**

239 The author(s) declare that they have no competing interests.

240

#### 241 **Funding**

242 Sample collection was achieved through the Deep SEARCH project, funded by the Bureau of Ocean  
243 Energy Management (contract M17PC00009 to TDI Brooks International) and the NOAA Office of  
244 Ocean Exploration and Research (for ship time). Additional support came from the NOAA Deep-Sea  
245 Coral Research and Technology Program. Data generation was supported by an award from the Institute

246 for Genomics and Evolutionary Medicine (iGEM) of Temple University to EEC. The National Academies  
247 of Sciences, Engineering, and Medicine Gulf Research Program, Early-Career Fellowship 2000013668 to  
248 SH, supported analysis and writing time.

249

## 250 **Authors' contributions**

251 SH and EEC conceptualized the project. EEC acquired and managed the funding, collected the samples,  
252 and provided computational resources. SH and EEC generated the data. SH curated the data, performed  
253 analyses, generated visualizations, and wrote the original draft. SH and EEC reviewed and edited the  
254 manuscript.

255

## 256 **Acknowledgments**

257 Alexis Weinnig assisted with the collection of samples. Amanda Glazier assisted with laboratory logistics  
258 and the composition of the proposal to iGEM. We thank Andrea Quattrini for the helpful discussions.  
259 Thanks to the science parties, captains, and crews of the expedition RB1903 aboard the NOAA Ship  
260 Ronald H. Brown.

261

## 262 **References**

- 263 1. Voolstra CR, Quigley KM, Davies SW, Parkinson JE, Peixoto RS, Aranda M, et al.. Consensus  
264 guidelines for advancing coral holobiont genome and specimen voucher deposition. *Front Mar Sci*.  
265 Frontiers Media SA; 2021; doi: 10.3389/fmars.2021.701784.
- 266 2. Stephens TG, Lee J, Jeong Y, Yoon HS, Putnam HM, Majerová E, et al.. High-quality genome  
267 assembles from key Hawaiian coral species. *Gigascience*. 2022; doi: 10.1093/gigascience/giac098.
- 268 3. Liew YJ, Aranda M, Voolstra CR. Reefgenomics.org - a repository for marine genomics data.  
269 *Database* . 2016; doi: 10.1093/database/baw152.
- 270 4. Cairns SD. Deep-water corals: an overview with special reference to diversity and distribution of deep-  
271 water scleractinian corals. *Bull Mar Sci*. 81:311–222007;
- 272 5. Mortensen PB, Hovland M, Brattegard T, Farestveit R. Deep water bioherms of the scleractinian coral  
273 *Lophelia pertusa* (L.) at 64° n on the Norwegian shelf: Structure and associated megafauna. *Sarsia*.  
274 Taylor & Francis; 80:145–581995;
- 275 6. Cordes EE, McGinley MP, Podowski EL, Becker EL, Lessard-Pilon S, Viada ST, et al.. Coral  
276 communities of the deep Gulf of Mexico. *Deep Sea Res Part I*. 55:777–872008;
- 277 7. Henry L-A, Roberts JM. Biodiversity and ecological composition of macrobenthos on cold-water coral  
278 mounds and adjacent off-mound habitat in the bathyal Porcupine Seabight, NE Atlantic. *Deep Sea Res*  
279 *Part I*. 54:654–722007;
- 280 8. Fosså JH, Mortensen PB, Furevik DM. The deep-water coral *Lophelia pertusa* in Norwegian waters:  
281 distribution and fishery impacts. *Hydrobiologia*. 471:1–122002;
- 282 9. Ross SW, Quattrini AM. The fish fauna associated with deep coral banks off the southeastern United  
283 States. *Deep Sea Res Part I*. 54:975–10072007;
- 284 10. Sweetman AK, Thurber AR, Smith CR, Levin LA, Mora C, Wei C-L, et al.. Major impacts of climate



- 285 change on deep-sea benthic ecosystems. *Elementa: Science of the Anthropocene*. 5:42017;
- 286 11. White HK, Hsing P-Y, Cho W, Shank TM, Cordes EE, Quattrini AM, et al.. Impact of the Deepwater  
287 Horizon oil spill on a deep-water coral community in the Gulf of Mexico. *Proc Natl Acad Sci U S A*.  
288 109:20303–82012;
- 289 12. Addamo AM, Vertino A, Stolarski J, García-Jiménez R, Taviani M, Machordom A. Merging  
290 scleractinian genera: the overwhelming genetic similarity between solitary *Desmophyllum* and colonial  
291 *Lophelia*. *BMC Evol Biol*. 16:1082016;
- 292 13. Emblem A, Karlsen BO, Evertsen J, Miller DJ, Moum T, Johansen SD. Mitogenome polymorphism  
293 in a single branch sample revealed by SOLiD deep sequencing of the *Lophelia pertusa* coral genome.  
294 *Gene*. 506:344–92012;
- 295 14. Prada C, Hanna B, Budd AF, Woodley CM, Schmutz J, Grimwood J, et al.. Empty Niches after  
296 Extinctions Increase Population Sizes of Modern Corals. *Curr Biol*. 26:3190–42016;
- 297 15. Cunning R, Bay RA, Gillette P, Baker AC, Traylor-Knowles N. Comparative analysis of the  
298 *Pocillopora damicornis* genome highlights role of immune system in coral evolution. *Sci Rep*.  
299 8:161342018;
- 300 16. Fuller ZL, Mocellin VJL, Morris LA, Cantin N, Shepherd J, Sarre L, et al.. Population genetics of the  
301 coral *Acropora millepora*: Toward genomic prediction of bleaching. *Science*. 2020; doi:  
302 10.1126/science.aba4674.
- 303 17. Voolstra CR, Li Y, Liew YJ, Baumgarten S, Zoccola D, Flot J-F, et al.. Comparative analysis of the  
304 genomes of *Stylophora pistillata* and *Acropora digitifera* provides evidence for extensive differences  
305 between species of corals. *Sci Rep*. 7:175832017;
- 306 18. Putnam NH, O’Connell BL, Stites JC, Rice BJ, Blanchette M, Calef R, et al.. Chromosome-scale  
307 shotgun assembly using an in vitro method for long-range linkage. *Genome Res*. 26:342–502016;
- 308 19. Lieberman-Aiden E, van Berkum NL, Williams L, Imakaev M, Ragozy T, Telling A, et al..  
309 Comprehensive mapping of long-range interactions reveals folding principles of the human genome.  
310 *Science*. 326:289–932009;
- 311 20. Kolmogorov M, Yuan J, Lin Y, Pevzner PA. Assembly of long, error-prone reads using repeat graphs.  
312 *Nat Biotechnol*. 37:540–62019;
- 313 21. Ruan J, Li H. Fast and accurate long-read assembly with wtdbg2. *Nat Methods*. 17:155–82020;
- 314 22. Chin C-S, Peluso P, Sedlazeck FJ, Nattestad M, Concepcion GT, Clum A, et al.. Phased diploid  
315 genome assembly with single-molecule real-time sequencing. *Nat Methods*. 13:1050–42016;
- 316 23. Hu J, Fan J, Sun Z, Liu S. NextPolish: a fast and efficient genome polishing tool for long-read  
317 assembly. *Bioinformatics*. 36:2253–52020;
- 318 24. Guan D, McCarthy SA, Wood J, Howe K, Wang Y, Durbin R. Identifying and removing haplotypic  
319 duplication in primary genome assemblies. *Bioinformatics*. 36:2896–82020;
- 320 25. Kurtz S, Phillippy A, Delcher AL, Smoot M, Shumway M, Antonescu C, et al.. Versatile and open  
321 software for comparing large genomes. *Genome Biol*. Springer; 5:R122004;

- 322 26. Chakraborty M, Baldwin-Brown JG, Long AD, Emerson JJ. Contiguous and accurate de novo  
323 assembly of metazoan genomes with modest long read coverage. *Nucleic Acids Res.* 44:e1472016;
- 324 27. Li H, Durbin R. Fast and accurate short read alignment with Burrows–Wheeler transform.  
325 *Bioinformatics.* Oxford Academic; 25:1754–602009;
- 326 28. Danecek P, Bonfield JK, Liddle J, Marshall J, Ohan V, Pollard MO, et al.. Twelve years of SAMtools  
327 and BCFtools. *Gigascience.* 2021; doi: 10.1093/gigascience/giab008.
- 328 29. Ghurye J, Pop M, Koren S, Bickhart D, Chin C-S. Scaffolding of long read assemblies using long  
329 range contact information. *BMC Genomics.* 18:5272017;
- 330 30. Ghurye J, Rhie A, Walenz BP, Schmitt A, Selvaraj S, Pop M, et al.. Integrating Hi-C links with  
331 assembly graphs for chromosome-scale assembly. *PLoS Comput Biol.* 15:e10072732019;
- 332 31. Challis R, Richards E, Rajan J, Cochrane G, Blaxter M. BlobToolKit - Interactive Quality Assessment  
333 of Genome Assemblies. *G3* . 10:1361–742020;
- 334 32. Altschul SF, Madden TL, Schäffer AA, Zhang J, Zhang Z, Miller W, et al.. Gapped BLAST and PSI-  
335 BLAST: a new generation of protein database search programs. *Nucleic Acids Res.* 25:3389–4021997;
- 336 33. The UniProt Consortium, Bateman A, Martin M-J, Orchard S, Magrane M, Agivetova R, et al..  
337 UniProt: the universal protein knowledgebase in 2021. *Nucleic Acids Res.* Oxford Academic; 49:D480–  
338 92021;
- 339 34. Buchfink B, Xie C, Huson DH. Fast and sensitive protein alignment using DIAMOND. *Nat Methods.*  
340 12:59–602015;
- 341 35. Li H. Minimap2: pairwise alignment for nucleotide sequences. *Bioinformatics.* 34:3094–1002018;
- 342 36. Bao Z, Eddy SR. Automated de novo identification of repeat sequence families in sequenced  
343 genomes. *Genome Res.* 12:1269–762002;
- 344 37. Price AL, Jones NC, Pevzner PA. De novo identification of repeat families in large genomes.  
345 *Bioinformatics.* 21 Suppl 1:i351-82005;
- 346 38. Chen N. Using RepeatMasker to identify repetitive elements in genomic sequences. *Curr Protoc*  
347 *Bioinformatics.* Chapter 4:Unit 4.102004;
- 348 39. Palmer JM. Funannotate: a fungal genome annotation and comparative genomics pipeline.  
349 <https://github.com/nextgenusfs/funannotate>.
- 350 40. Glazier A, Herrera S, Weinnig A, Kurman M, Gómez CE, Cordes E. Regulation of ion transport and  
351 energy metabolism enables certain coral genotypes to maintain calcification under experimental ocean  
352 acidification. *Mol Ecol.* 29:1657–732020;
- 353 41. Grabherr MG, Haas BJ, Yassour M, Levin JZ, Thompson DA, Amit I, et al.. Full-length transcriptome  
354 assembly from RNA-Seq data without a reference genome. *Nat Biotechnol.* 29:644–522011;
- 355 42. Kim D, Paggi JM, Park C, Bennett C, Salzberg SL. Graph-based genome alignment and genotyping  
356 with HISAT2 and HISAT-genotype. *Nat Biotechnol.* 37:907–152019;
- 357 43. Haas BJ, Delcher AL, Mount SM, Wortman JR, Smith RK Jr, Hannick LI, et al.. Improving the

- 358 *Arabidopsis* genome annotation using maximal transcript alignment assemblies. *Nucleic Acids Res.*  
359 31:5654–662003;
- 360 44. UniProt Consortium. UniProt: the Universal Protein Knowledgebase in 2023. *Nucleic Acids Res.*  
361 2022; doi: 10.1093/nar/gkac1052.
- 362 45. Lomsadze A, Ter-Hovhannisyan V, Chernoff YO, Borodovsky M. Gene identification in novel  
363 eukaryotic genomes by self-training algorithm. *Nucleic Acids Res.* 33:6494–5062005;
- 364 46. Lomsadze A, Burns PD, Borodovsky M. Integration of mapped RNA-Seq reads into automatic  
365 training of eukaryotic gene finding algorithm. *Nucleic Acids Res.* 42:e1192014;
- 366 47. Stanke M, Waack S. Gene prediction with a hidden Markov model and a new intron submodel.  
367 *Bioinformatics.* 19 Suppl 2:ii215-252003;
- 368 48. Korf I. Gene finding in novel genomes. *BMC Bioinformatics.* 5:592004;
- 369 49. Majoros WH, Pertea M, Salzberg SL. TigrScan and GlimmerHMM: two open source ab initio  
370 eukaryotic gene-finders. *Bioinformatics.* 20:2878–92004;
- 371 50. Haas BJ, Salzberg SL, Zhu W, Pertea M, Allen JE, Orvis J, et al.. Automated eukaryotic gene  
372 structure annotation using EVIDENCEModeler and the Program to Assemble Spliced Alignments. *Genome*  
373 *Biol.* 9:R72008;
- 374 51. Chan PP, Lin BY, Mak AJ, Lowe TM. tRNAscan-SE 2.0: improved detection and functional  
375 classification of transfer RNA genes. *Nucleic Acids Res.* 49:9077–962021;
- 376 52. Mistry J, Finn RD, Eddy SR, Bateman A, Punta M. Challenges in homology search: HMMER3 and  
377 convergent evolution of coiled-coil regions. *Nucleic Acids Res.* 41:e1212013;
- 378 53. Buchfink B, Reuter K, Drost H-G. Sensitive protein alignments at tree-of-life scale using DIAMOND.  
379 *Nat Methods.* 18:366–82021;
- 380 54. Huerta-Cepas J, Szklarczyk D, Heller D, Hernández-Plaza A, Forslund SK, Cook H, et al.. eggNOG  
381 5.0: a hierarchical, functionally and phylogenetically annotated orthology resource based on 5090  
382 organisms and 2502 viruses. *Nucleic Acids Res.* 47:D309–142019;
- 383 55. Cantalapiedra CP, Hernández-Plaza A, Letunic I, Bork P, Huerta-Cepas J. eggNOG-mapper v2:  
384 Functional Annotation, Orthology Assignments, and Domain Prediction at the Metagenomic Scale. *Mol*  
385 *Biol Evol.* 38:5825–92021;
- 386 56. Rawlings ND, Barrett AJ, Thomas PD, Huang X, Bateman A, Finn RD. The MEROPS database of  
387 proteolytic enzymes, their substrates and inhibitors in 2017 and a comparison with peptidases in the  
388 PANTHER database. *Nucleic Acids Res.* 46:D624–322018;
- 389 57. Kriventseva EV, Kuznetsov D, Tegenfeldt F, Manni M, Dias R, Simão FA, et al.. OrthoDB v10:  
390 sampling the diversity of animal, plant, fungal, protist, bacterial and viral genomes for evolutionary and  
391 functional annotations of orthologs. *Nucleic Acids Res.* 47:D807–112019;
- 392 58. Manni M, Berkeley MR, Seppey M, Simão FA, Zdobnov EM. BUSCO Update: Novel and  
393 Streamlined Workflows along with Broader and Deeper Phylogenetic Coverage for Scoring of  
394 Eukaryotic, Prokaryotic, and Viral Genomes. *Mol Biol Evol.* 38:4647–542021;

- 395 59. Jones P, Binns D, Chang H-Y, Fraser M, Li W, McAnulla C, et al.. InterProScan 5: genome-scale  
396 protein function classification. *Bioinformatics*. 30:1236–402014;
- 397 60. Gurevich A, Saveliev V, Vyahhi N, Tesler G. QUASt: quality assessment tool for genome  
398 assemblies. *Bioinformatics*. 29:1072–52013;
- 399 61. Katoh K, Standley DM. MAFFT multiple sequence alignment software version 7: improvements in  
400 performance and usability. *Mol Biol Evol*. 30:772–802013;
- 401 62. Stamatakis A. RAxML version 8: a tool for phylogenetic analysis and post-analysis of large  
402 phylogenies. *Bioinformatics*. 30:1312–32014;
- 403 63. McFadden CS, Quattrini AM, Brugler MR, Cowman PF, Dueñas LF, Kitahara MV, et al..  
404 Phylogenomics, Origin, and Diversification of Anthozoans (Phylum Cnidaria). *Syst Biol*. 70:635–472021;



**Appendix 1. Statistics for *Lophelia pertusa* intermediate and final assemblies.**

| Assembly ID              | A          |                   |                               | B          |                    | C              |                             | D                  |                                  | E                  |                                |                                            | F                    | G                | H                          | I                       |
|--------------------------|------------|-------------------|-------------------------------|------------|--------------------|----------------|-----------------------------|--------------------|----------------------------------|--------------------|--------------------------------|--------------------------------------------|----------------------|------------------|----------------------------|-------------------------|
| Input Data               | PacBio CLR | PacBio CLR        | PacBio CLR                    | PacBio CLR | PacBio CLR         | PacBio CLR     | PacBio CLR                  | PacBio CLR         | PacBio CLR                       | PacBio CLR         | PacBio CLR                     | PacBio CLR                                 | PacBio CLR + Chicago | PacBio CLR + HiC | PacBio CLR + Chicago + HiC | H                       |
| Software                 | flye       | flye + purge_dups | flye + purge_dups+ NextPolish | wtdbg2     | wtdbg2+ NextPolish | FALCON + arrow | FALCON + arrow + purge_dups | quickmerge (A + B) | quickmerge (A + B) + Next polish | quickmerge (D + C) | quickmerge (D+C) + Next polish | quickmerge (D+C) + Next polish+ purge_dups | SALSA2 (E + Chicago) | SALSA2 (E + HiC) | SALSA2 (F + HiC)           | BlobToolKit             |
| Sanitation               |            |                   |                               |            |                    |                |                             |                    |                                  |                    |                                |                                            |                      |                  | Prokaryot.                 | GC, cov., no-hit, undef |
| # contigs                | 17,029     | 13,865            | 13,865                        | 7,345      | 7,345              | 8,987          | 6,321                       | 11,237             | 11,237                           | 10,226             | 10,226                         | 10,011                                     | 7,818                | 8,712            | 7,385                      | <b>2,858</b>            |
| # contigs (>= 10 Kbp)    | 11,441     | 8,278             | 8,514                         | 5,789      | 5,863              | 8,710          | 6,044                       | 6,218              | 6,248                            | 5,431              | 5,438                          | 5,223                                      | 3,284                | 4,073            | 2,910                      | <b>2,019</b>            |
| # contigs (>= 25 Kbp)    | 7,012      | 4,688             | 4,708                         | 3,543      | 3,573              | 6,729          | 4,283                       | 3,226              | 3,227                            | 2,768              | 2,768                          | 2,528                                      | 1,300                | 1,765            | 1,033                      | <b>924</b>              |
| # contigs (>=50 Kbp)     | 4,449      | 3,271             | 3,274                         | 2,119      | 2,121              | 4,292          | 2,835                       | 2,142              | 2,145                            | 1,843              | 1,844                          | 1,630                                      | 897                  | 1,148            | 676                        | <b>652</b>              |
| Largest contig(Kbp)      | 1,284      | 1,284             | 1,278                         | 2,222      | 2,198              | 1,100          | 1,100                       | 3,039              | 3,036                            | 3,134              | 3,136                          | 3,136                                      | 5,013                | 6,202            | 10,677                     | <b>10,677</b>           |
| Total length (Kbp)       | 781,392    | 615,714           | 618,620                       | 546,887    | 548,050            | 685,805        | 487,642                     | 620,046            | 619,797                          | 635,659            | 635,608                        | 588,242                                    | 589,370              | 588,927          | 589,296                    | <b>556,859</b>          |
| Total length (>= 1 Kbp)  | 781,186    | 615,508           | 618,417                       | 546,886    | 548,049            | 685,805        | 487,642                     | 619,842            | 619,593                          | 635,455            | 635,406                        | 588,040                                    | 589,174              | 588,731          | 589,104                    | <b>556,857</b>          |
| Total length (>= 5 Kbp)  | 774,389    | 608,711           | 611,986                       | 545,841    | 547,109            | 685,800        | 487,637                     | 613,412            | 613,222                          | 629,083            | 629,053                        | 581,686                                    | 583,014              | 582,517          | 583,001                    | <b>556,159</b>          |
| Total length (>= 10 Kbp) | 751,665    | 585,996           | 590,000                       | 536,436    | 537,966            | 683,319        | 485,155                     | 594,011            | 593,904                          | 611,231            | 611,203                        | 563,836                                    | 566,568              | 565,396          | 566,844                    | <b>551,248</b>          |
| Total length (>= 25 Kbp) | 680,889    | 529,945           | 530,627                       | 498,949    | 499,636            | 648,954        | 455,537                     | 547,800            | 547,280                          | 570,231            | 570,093                        | 522,303                                    | 537,194              | 530,454          | 539,228                    | <b>534,434</b>          |
| Total length (>= 50 Kbp) | 589,893    | 480,070           | 480,059                       | 449,330    | 448,950            | 685,805        | 403,091                     | 509,550            | 509,117                          | 537,749            | 537,651                        | 490,800                                    | 523,329              | 509,117          | 526,899                    | <b>525,028</b>          |
| GC (%)                   | 39.57      | 39.59             | 39.57                         | 39.22      | 39.40              | 39.36          | 39.37                       | 39.55              | 39.55                            | 39.54              | 39.54                          | 39.55                                      | 39.55                | 39.55            | 39.55                      | <b>39.53</b>            |
| N50 (Kbp)                | 114        | 138               | 137                           | 249        | 248                | 123            | 142                         | 331                | 329                              | 455                | 452                            | 467                                        | 901                  | 824              | 1,440                      | <b>1,614</b>            |
| N75 (bp)                 | 51         | 59                | 58                            | 84         | 82                 | 65             | 69                          | 82                 | 82                               | 117                | 117                            | 109                                        | 413                  | 219              | 553                        | <b>689</b>              |
| L50                      | 1,817      | 1,229             | 1,243                         | 586        | 590                | 1,582          | 977                         | 455                | 457                              | 366                | 366                            | 329                                        | 186                  | 155              | 94                         | <b>83</b>               |
| L75                      | 4,373      | 2,935             | 2,976                         | 1,509      | 1,527              | 3,487          | 2,200                       | 1,453              | 1,458                            | 1,038              | 1,040                          | 953                                        | 420                  | 495              | 258                        | <b>219</b>              |
| # N's / 100 kbp          | 2.23       | 3.01              | 0                             | 0.00       | 0                  | 0.00           | 0.51                        | 0                  | 0                                | 0.05               | 0.0                            | 0.5                                        | 191.90               | 116.74           | 238.68                     | <b>248.99</b>           |
| Busco (metazoa, n=954)   |            |                   | 87.4                          |            | 90.7               |                | 75.1                        |                    | 87.9                             |                    |                                | 88.6                                       | 89.0                 | 88.9             | 89.0                       | <b>88.9</b>             |
|                          |            |                   | 4.4                           |            | 0.9                |                | 2.1                         |                    | 4.7                              |                    |                                | 2.4                                        | 2.1                  | 2.1              | 2.1                        | <b>2.2</b>              |
|                          |            |                   | 3.4                           |            | 2.8                |                | 4.2                         |                    | 2.1                              |                    |                                | 2.1                                        | 2.1                  | 2.1              | 2.1                        | <b>2.1</b>              |
|                          |            |                   | 4.8                           |            | 5.6                |                | 18.6                        |                    | 5.3                              |                    |                                | 6.9                                        | 6.8                  | 6.9              | 6.8                        | <b>6.8</b>              |
